# Supplementary material
Source: PubMed Central journal article supplement (PMC5788808)
Supplement: NIHMS910092-supplement.pdf [file NIHMS910092-supplement.pdf]

# 1 Supplemental Information

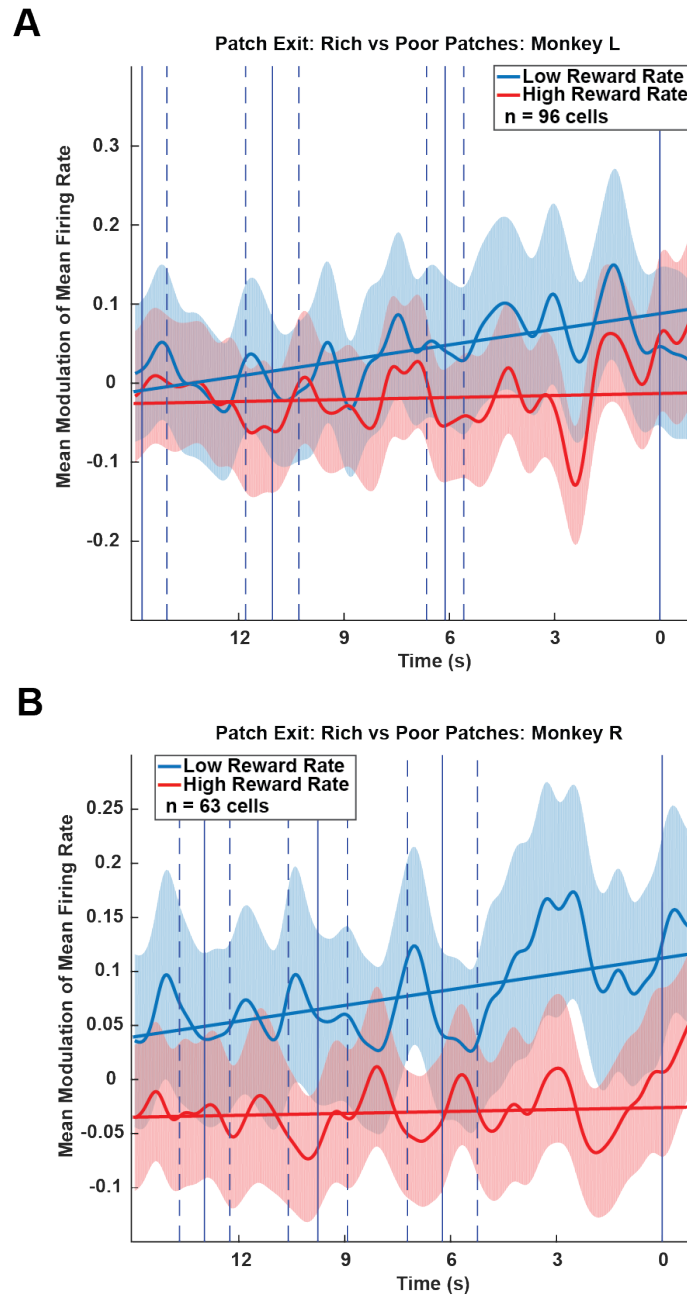

2

3 **Figure S1. Related to Figure 2.** Individual monkey results showing ramping activity prior to  
4 patch leaving in poor (z-scored reward rate  $< 0$ ; blue traces) but not in rich (z-scored reward rate  
5  $\geq 0$ ; red traces) patches. **A.** Monkey L, 96 neurons, 16 (17%) of 96 cells significant (patch-by-  
6 patch vs. z-scored reward rate linear regression,  $p < 0.05$ ). Slope for poor environments was  
7 significant (linear regression,  $p < 1 \times 10^{-6}$ ) but not for rich ( $p > 0.48$ ), and was significantly steeper  
8 than rich (ANCOVA,  $p < 0.005$ ,  $F(1,596) = 10.5810$ ). **B.** Monkey R, 63 neurons, 4 (6%) of 63

1 cells significant. Slope for poor patches was significant ( $p < 0.05$ ) but not for rich ( $p > 0.9$ ),  
 2 though there was not a significant difference between the two slopes ( $p > 0.1$ ,  $F(1,596) =$   
 3  $2.6541$ ).

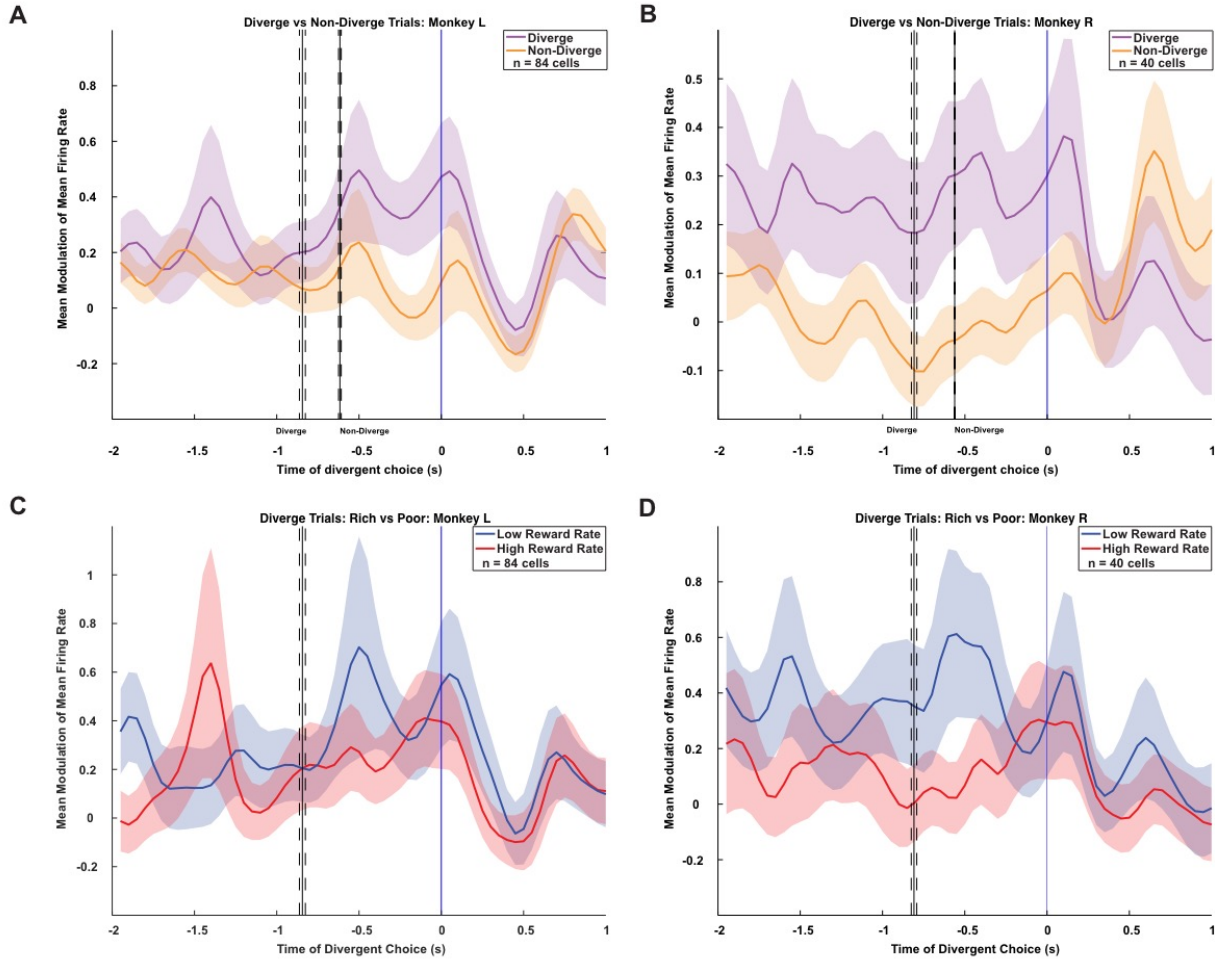

4  
 5 **Figure S2. Related to Figure 4.** A. Population plot for diverge (purple trace) and non-diverge  
 6 (orange trace) trials for Monkey L. 43 (51%) of 84 neurons signaled diverge choices, and 40  
 7 (48%) of 84 neurons predicted divergences one choice in advance, with 33 (39%) of 84 neurons  
 8 signaling both for Monkey L. 39 (46%) of 84 cells predicted diverge choices in the 1 s preceding  
 9 a decision to diverge from the trapline. B. Population plot for diverge (purple trace) and non-  
 10 diverge (orange trace) trials for Monkey R. 16 (40%) of 40 neurons signaled diverge choices,  
 11 and 14 (35%) of 40 neurons predicted divergences one choice in advanced, with 11 (28%) of 40  
 12 neurons signaling both for Monkey R. 20 (50%) of 40 cells predicted diverge choices in the 1 s  
 13 before a divergence. C. Population plot for rich and poor environments on diverge trials only for  
 14 Monkey L. The activity of 14 (17%) of 84 cells correlated with reward rate. Rich contexts (red

1 trace): reward rate z-score  $> 0$ ; poor contexts (blue trace): reward rate z-score  $\leq 0$ . **D.** Population  
2 plot for rich and poor environments on diverge trials only for Monkey R. The activity of 5 (13%)  
3 of 40 cells correlated with reward rate.

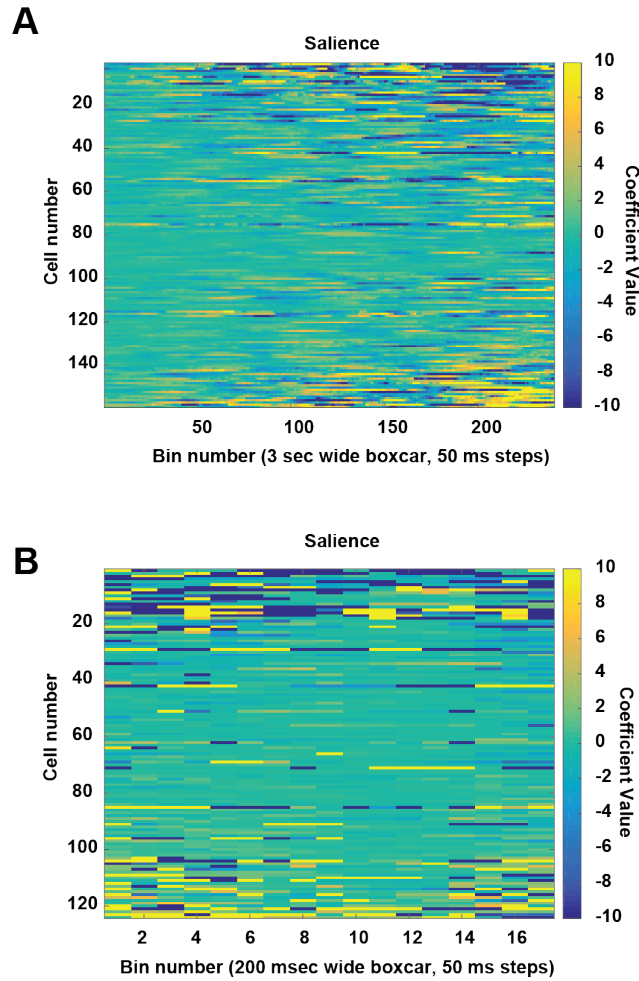

4  
5 **Figure S3. Related to Figures 2 and 4.** Dynamic signaling of salience preceding the decision to  
6 disengage. **A.** Heatmap of regression coefficients from sliding boxcar analysis (3 s wide boxcar,  
7 50 ms steps) starting 15 s before patch leave during patch leaving task. For display purposes,  
8 coefficients were thresholded at  $\pm 10$ . A sinusoidal pattern in the strengths of the coefficients,  
9 roughly matching on-trial and off-trial (i.e., start of intertrial interval) times, can be seen for  
10 positively coding (bottom of heatmap) and negatively coding (top) cells. **B.** Heatmap of  
11 regression coefficients from sliding boxcar analysis (200 ms wide boxcar, 50 ms steps) starting 1  
12 s before diverging during traveling salesman task. For display purposes, coefficients were  
13 thresholded at  $\pm 10$ . The sinusoidal pattern observed in PCC neurons prior to leaving a patch  
14 (Figure S1A) is weakly evident at best.
